# Supplementary material for: MRI-derived extracellular volume as a biomarker of cancer therapy cardiotoxicity: systematic review and meta-analysis
Source: Springer Nature journal article supplement (doi:10.1007/s00330-023-10260-8), 2023-10-12
Supplement: MOESM1 [file 26157194]

# **MRI-derived extracellular volume as a biomarker of cancer therapy cardiotoxicity: Systematic review and meta-analysis**

## **Electronic Supplementary Material**

### **Supplementary Material 1: Search string.**

Update: November 15th, 2022

Databases used: MEDLINE (PubMed), EMBASE (Elsevier), Web of Science (Clarivate Analytics), and the Cochrane Library databases (Cochrane Database of Systematic Reviews and Cochrane Central Register of Controlled Trials).

A controlled vocabulary (medical subject headings in PubMed and EMBASE thesaurus keywords in EMBASE) was used. The search string was built using the following strategy, based on the PICO model:

'extracellular space'/exp + synonyms

'cardiovascular magnetic resonance'/exp + synonyms

'chemotherapy'/exp OR 'radiotherapy'/exp + synonyms

'cardiotoxicity'/exp + synonyms

Full search strings

The full search string for EMBASE (Elsevier) was:

('extracellular space'/exp OR 'extracellular fluid space' OR 'extracellular fluid volume' OR 'extracellular mass' OR 'extracellular space' OR 'extracellular volume' OR 'extracellular water volume' OR 'space, extracellular' OR ecv OR 'cardiac biomarker'/exp OR 'cardiovascular biomarker' OR 'myocardial extracellular volume'/exp) AND ('cardiovascular magnetic resonance'/exp OR 'cmr (cardiovascular magnetic

resonance)' OR 'cardiac magnetic resonance' OR 'cardiac magnetic resonance imaging' OR 'cardiovascular mri' OR 'cardiovascular magnetic resonance' OR 'cardiovascular magnetic resonance imaging' OR 'nuclear magnetic resonance imaging'/exp OR 'mri' OR 'nmr imaging' OR 'imaging, magnetization transfer' OR 'magnetic resonance imaging' OR 'magnetic resonance tomography' OR 'magnetization transfer imaging' OR 'mr imaging' OR 'nuclear magnetic resonance imaging' OR 'cardiac mri') AND ('chemotherapy'/exp OR 'chemotherapeutics' OR 'chemotherapy' OR 'drug therapy'/exp OR 'drug therapy' OR 'drug treatment' OR 'medicament therapy' OR 'medicament treatment' OR 'medication' OR 'medicinal therapy' OR 'medicinal treatment' OR 'pharmaceutical therapy' OR 'pharmaceutical treatment' OR 'pharmacotherapy' OR 'pharmaco-treatment' OR 'pharmacological therapy' OR 'pharmacological treatment' OR 'pharmacotherapy' OR 'pharmacotreatment' OR 'therapeutic uses' OR 'therapy, drug' OR 'therapy, pharmacological' OR 'treatment, drug' OR 'treatment, pharmacological' OR 'radiotherapy'/exp OR 'bioradiant therapy' OR 'bucky irradiation' OR 'bucky radiation' OR 'bucky radiotherapy' OR 'bucky ray' OR 'bucky ray radiation' OR 'bucky therapy' OR 'fractionated radiotherapy' OR 'hemibody irradiation' OR 'hypophysectomy, radiation' OR 'hypophysis irradiation' OR 'hypophysis radiation' OR 'irradiation therapy' OR 'irradiation treatment' OR 'irradiation, hypophysis' OR 'lymphatic irradiation' OR 'pituitary irradiation' OR 'radiation beam centration' OR 'radiation repair' OR 'radiation therapy' OR 'radiation treatment' OR 'radio therapy' OR 'radio treatment' OR 'radiohypophysectomy' OR 'radiology, therapeutic' OR 'radiotherapy' OR 'radiotreatment' OR 'roentgen irradiation, therapeutic' OR 'roentgen therapy' OR 'roentgen treatment' OR 'rontgen therapy' OR 'therapeutic radiology' OR 'therapy, irradiation' OR 'therapy, radiation' OR 'therapy, roentgen' OR 'treatment, irradiation' OR 'treatment, radiation' OR 'treatment, roentgen' OR 'x radiotherapy' OR 'x ray therapy' OR 'x ray treatment' OR 'x-ray therapy' OR 'cancer radiotherapy'/exp OR 'cancer irradiation therapy' OR 'cancer radiation' OR 'cancer radiation therapy' OR 'cancer radiation, therapeutic' OR 'cancer radiotherapy' OR 'radiotherapy, cancer' OR 'tumor irradiation' OR 'tumor radiation' OR 'tumor radiotherapy' OR 'tumour irradiation' OR 'tumour radiation' OR 'tumour radiotherapy' OR 'intensity modulated radiation therapy'/exp OR 'imrt' OR 'intensity modulated arc therapy' OR 'intensity

modulated photon radiotherapy' OR 'intensity modulated radiation therapy' OR 'intensity modulated radiotherapy' OR 'intensity modulated therapy' OR 'intensity-modulated radiation therapy' OR 'intensity-modulated radiotherapy' OR 'radiotherapy, intensity modulated' OR 'radiotherapy, intensity-modulated') AND ('cardiotoxicity'/exp OR 'cardio toxicity' OR 'cardiotoxic effect' OR 'cardiotoxicity' OR 'cardiotoxicology' OR 'heart toxicity' OR 'toxicity, heart' OR 'cardiac toxicity')

The full search string for PubMed (MEDLINE) was:

# 1 TOPIC: (Extracellular volume)

(((((extracellular space[MeSH Terms]) OR (extracellular spaces[MeSH Terms])) OR (ECV[MeSH Terms])) OR (ECV)) OR (Extracellular mass)) OR (myocardial extracellular volume)

# 2 TOPIC: (Magnetic resonance imaging)

(((((magnetic resonance imaging[MeSH Terms]) OR (Cardiac magnetic resonance imaging[MeSH Terms])) OR (CMR[MeSH Terms])) OR (MRI[MeSH Terms])) OR (cardiovascular MRI[MeSH Terms])) OR (nuclear magnetic resonance imaging[MeSH Terms])) OR (NMRI[MeSH Terms])

# 3 TOPIC: (Chemotherapy and Radiotherapy)

((((((Chemotherapy[MeSH Terms]) OR (Radiotherapy[MeSH Terms])) OR (adjuvant chemotherapy[MeSH Terms])) OR (adjuvant radiotherapy[MeSH Terms])) OR (adjuvant radiotherapies[MeSH Terms])) OR (treatment drug[MeSH Terms])) OR (drug treatment center[MeSH Terms])) OR (irradiation[MeSH Terms])

# 4 TOPIC: (Cardiotoxicity)

((cardiotoxicity[MeSH Terms]) OR (cardiac toxicity[MeSH Terms])) OR (cardio toxicity[MeSH Terms])) OR (cardiotoxic effect[MeSH Terms])

The full search string for Web of Science (Clarivate Analytics) was:

((((((((((KP=(Extracellular volume)) OR KP=(Extracellular space)) OR KP=(ECV)) OR KP=(myocardial extracellular volume)) AND  
KP=(magnetic resonance imaging)) OR KP=(Cardiac MRI)) OR KP=(cardiovascular MRI)) OR KP=(Cardiac magnetic resonance imaging)) AND  
KP=(Chemotherapy)) OR KP=(Radiotherapy)) AND KP=(Cardiotoxicity)

The full search string for Cochrane Library (Cochrane) was:

“Extracellular volume” OR “Extracellular space” in Title Abstract Keyword AND “Magnetic resonance imaging” in Title Abstract Keyword AND  
“Chemotherapy” OR “Radiotherapy” in Title Abstract Keyword AND “Cardiotoxicity” in Title Abstract Keyword AND “Biomarker” in Title  
Abstract Keyword - (Word variations have been searched)

**Supplementary Material 2: Results from quality assessment according to the QualSyst tool.**

| Criteria                                                       | Beukema et al. 2022 | Canada et al. 2022 | de Groot et al. 2021 | Tahir et al. 2021 | Harries et al. 2021 | Kirkham et al. 2021 | Faron et al. 2021 | Mawad et al. 2021 | Altaha et al. 2020 | Bergom et al. 2020 | Mokshagundam et al. 2020 | Wolf et al. 2020 | Ferreira de Souza et al. 2018 | Muehlberg et al. 2018 | Takagi et al. 2018 | Heck et al. 2017 | Jordan et al. 2016 | Neilan et al. 2013 | Tham et al. 2013 |
|----------------------------------------------------------------|---------------------|--------------------|----------------------|-------------------|---------------------|---------------------|-------------------|-------------------|--------------------|--------------------|--------------------------|------------------|-------------------------------|-----------------------|--------------------|------------------|--------------------|--------------------|------------------|
| Question/objective sufficiently described?                     | 2                   | 2                  | 2                    | 2                 | 2                   | 2                   | 2                 | 2                 | 2                  | 2                  | 2                        | 2                | 2                             | 2                     | 2                  | 2                | 2                  | 1                  | 2                |
| Study design evident and appropriate?                          | 2                   | 2                  | 2                    | 2                 | 2                   | 2                   | 2                 | 2                 | 2                  | 2                  | 2                        | 1                | 2                             | 2                     | 2                  | 2                | 2                  | 1                  | 2                |
| Context for the study clear?                                   | 2                   | 2                  | 2                    | 2                 | 1                   | 2                   | 2                 | 2                 | 2                  | 2                  | 2                        | 2                | 2                             | 2                     | 2                  | 2                | 2                  | 2                  | 2                |
| Connection to a theoretical framework/wider body of knowledge? | 1                   | 2                  | 2                    | 1                 | 2                   | 2                   | 2                 | 2                 | 2                  | 2                  | 1                        | 1                | 2                             | 1                     | 2                  | 2                | 1                  | 1                  | 2                |
| Sampling strategy described, relevant, and justified?          | 1                   | 1                  | 2                    | 1                 | 1                   | 2                   | 1                 | 1                 | 2                  | 1                  | 1                        | 1                | 1                             | 1                     | 1                  | 2                | 1                  | 1                  | 1                |
| Data collection methods clearly described and systematic?      | 1                   | 2                  | 2                    | 1                 | 1                   | 2                   | 2                 | 1                 | 2                  | 2                  | 1                        | 1                | 2                             | 1                     | 2                  | 2                | 1                  | 1                  | 1                |
| Data analysis clearly described and systematic?                | 2                   | 2                  | 2                    | 2                 | 1                   | 2                   | 2                 | 1                 | 2                  | 2                  | 1                        | 2                | 2                             | 1                     | 2                  | 2                | 1                  | 2                  | 1                |
| Use of verification procedure(s) to establish credibility?     | 1                   | 1                  | 1                    | 1                 | 1                   | 1                   | 1                 | 1                 | 1                  | 1                  | 1                        | 1                | 1                             | 1                     | 1                  | 1                | 1                  | 1                  | 1                |
| Conclusions supported by the results?                          | 1                   | 2                  | 2                    | 1                 | 1                   | 2                   | 2                 | 2                 | 2                  | 2                  | 2                        | 2                | 2                             | 2                     | 2                  | 2                | 2                  | 2                  | 1                |
| Reflexivity of the account?                                    | 1                   | 1                  | 1                    | 2                 | 2                   | 2                   | 2                 | 2                 | 2                  | 2                  | 1                        | 2                | 2                             | 1                     | 2                  | 2                | 1                  | 1                  | 1                |
| <b>Total</b>                                                   | <b>14</b>           | <b>17</b>          | <b>18</b>            | <b>15</b>         | <b>14</b>           | <b>19</b>           | <b>18</b>         | <b>16</b>         | <b>19</b>          | <b>18</b>          | <b>14</b>                | <b>15</b>        | <b>18</b>                     | <b>14</b>             | <b>18</b>          | <b>19</b>        | <b>14</b>          | <b>13</b>          | <b>14</b>        |
| <b>Overall (%)</b>                                             | <b>70%</b>          | <b>85%</b>         | <b>90%</b>           | <b>75%</b>        | <b>70%</b>          | <b>95%</b>          | <b>90%</b>        | <b>80%</b>        | <b>95%</b>         | <b>90%</b>         | <b>70%</b>               | <b>75%</b>       | <b>90%</b>                    | <b>70%</b>            | <b>90%</b>         | <b>95%</b>       | <b>70%</b>         | <b>65%</b>         | <b>70%</b>       |
